# Supplementary material for: Stratifying Brain Tumour Histological Sub-Types: The Application of ATR-FTIR Serum Spectroscopy in Secondary Care
Source: PubMed Central journal article supplement (PMC7408619; doi:10.3390/cancers12071710), 2020-06-27
Supplement: cancers-12-01710-s001.pdf [file cancers-12-01710-s001.pdf]

# Supplementary Materials: Stratifying Brain Tumour Histological Sub-Types: The Application of ATR-FTIR Serum Spectroscopy in Secondary Care

James M. Cameron, Christopher Rinaldi, Holly J. Butler, Mark G Hegarty, Paul M. Brennan, Michael D. Jenkinson, Khaja Syed, Katherine M. Ashton, Timothy P. Dawson, David S. Palmer and Matthew J. Baker

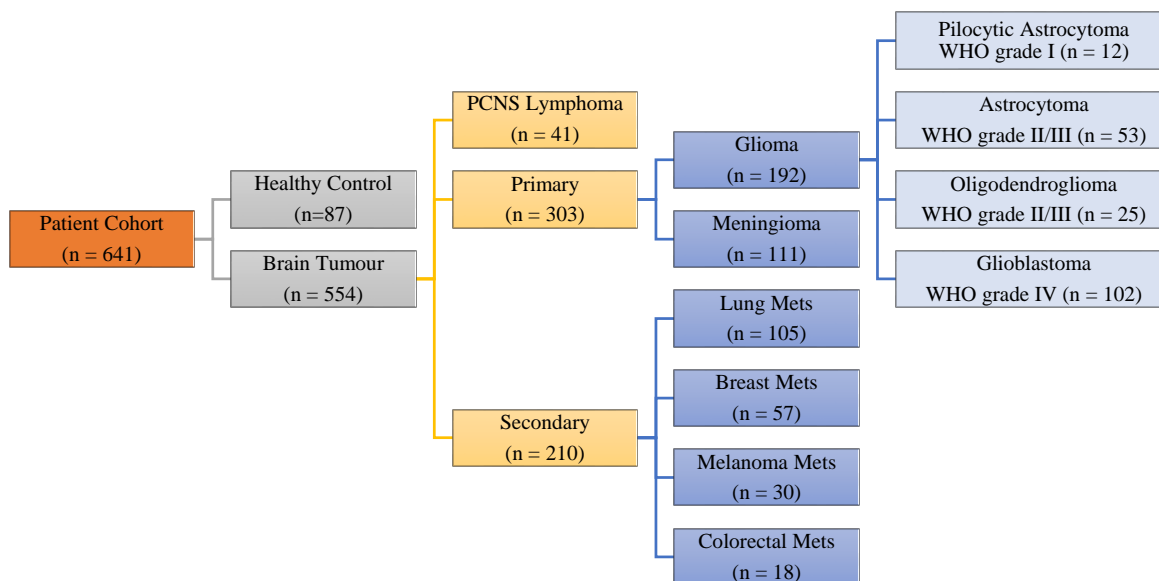

**Figure S1.** - Breakdown of the large brain cancer cohort with the number of patient samples used for the classifications.

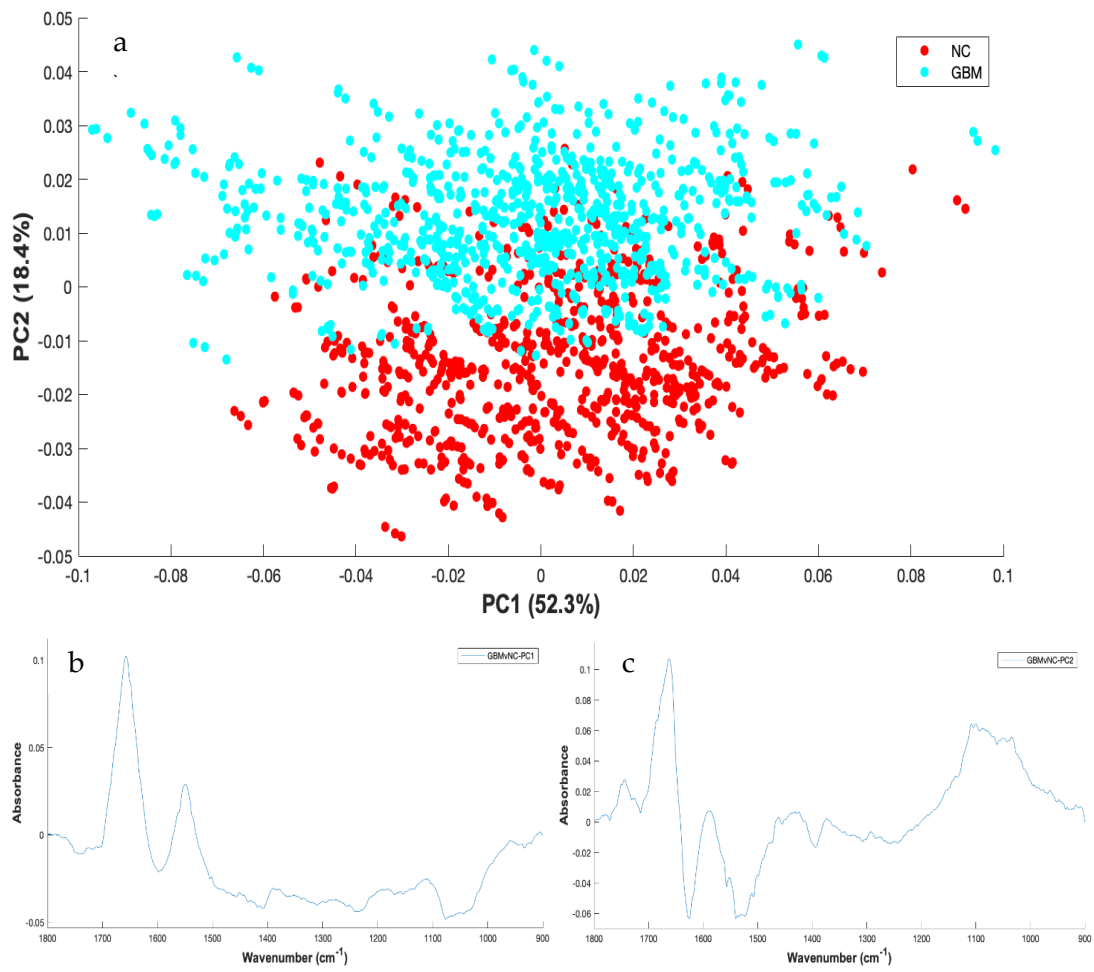

**Figure S2.** (a) Principal component analysis scores plot of PC1 and PC2 displaying the variance between GBM (blue) and healthy control (red); (b) PC1 loadings and c) PC2 loadings describe which wavenumbers account for the most discrimination.

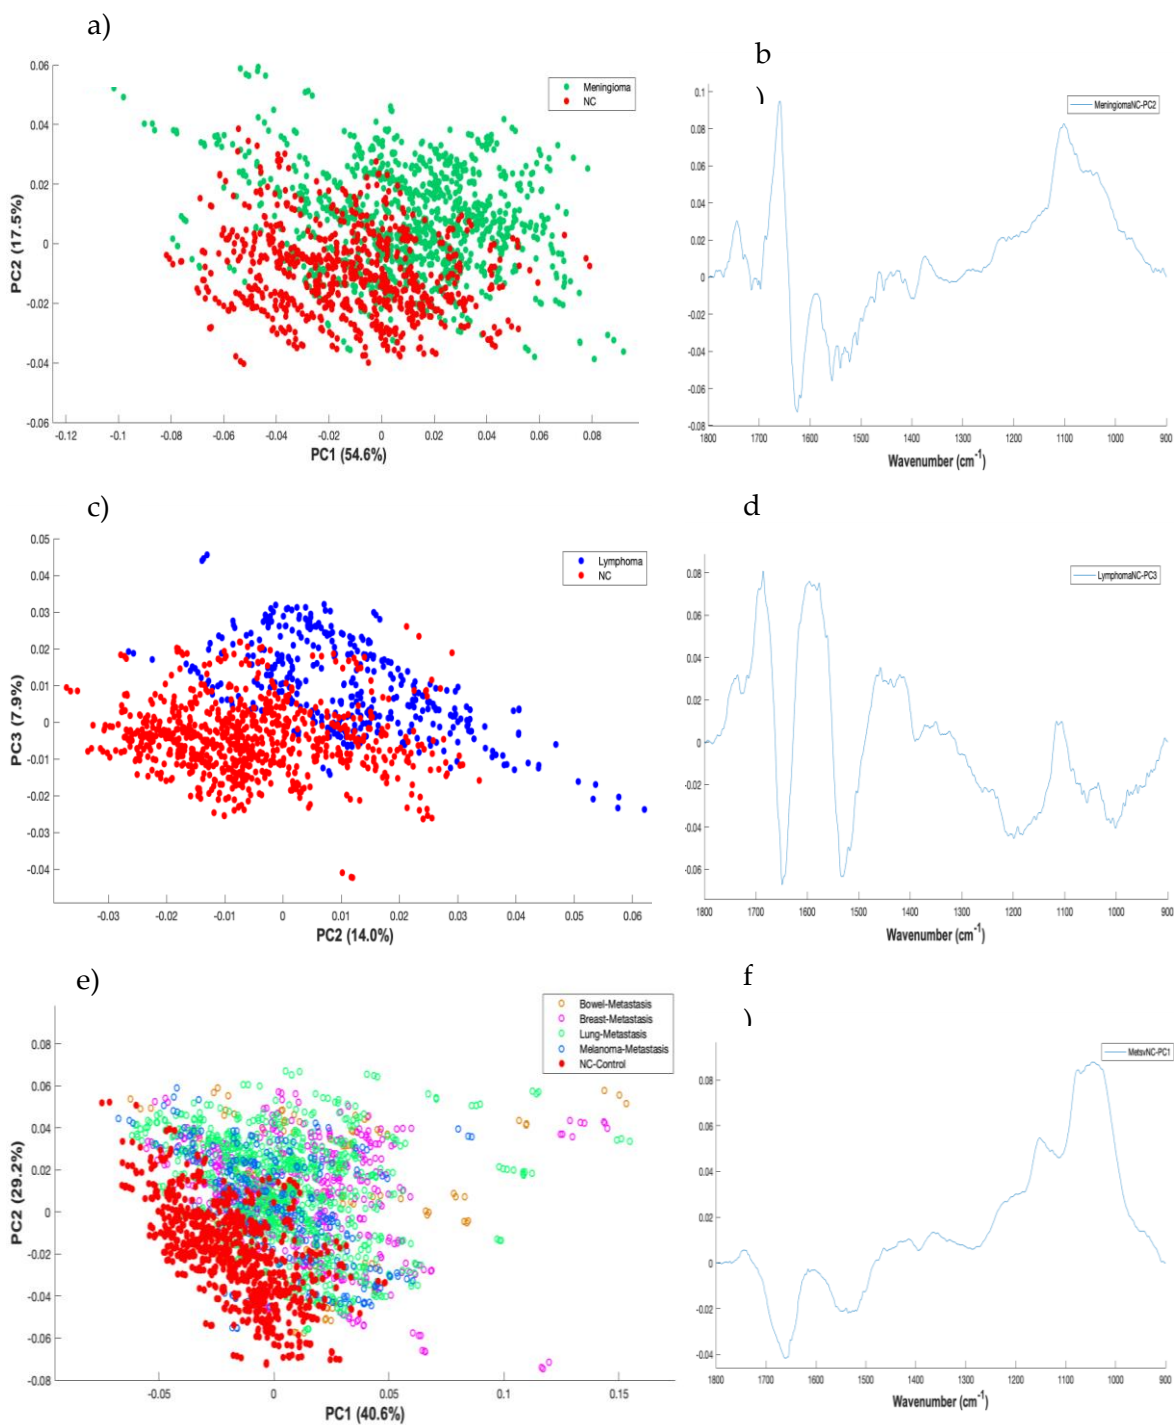

**Figure S3.** – Principal component analysis scores plots displaying the biggest separation between: healthy control (red) *versus*; **a)** meningioma (green), **c)** lymphoma (blue) and **e)** metastasis (bowel: orange rings, breast: pink rings, lung: green rings, melanoma: blue rings). Corresponding loadings plots for the principle component that describes which wavenumbers account for the separation of; **b)** meningioma, **d)** lymphoma and **f)** metastasis against control.

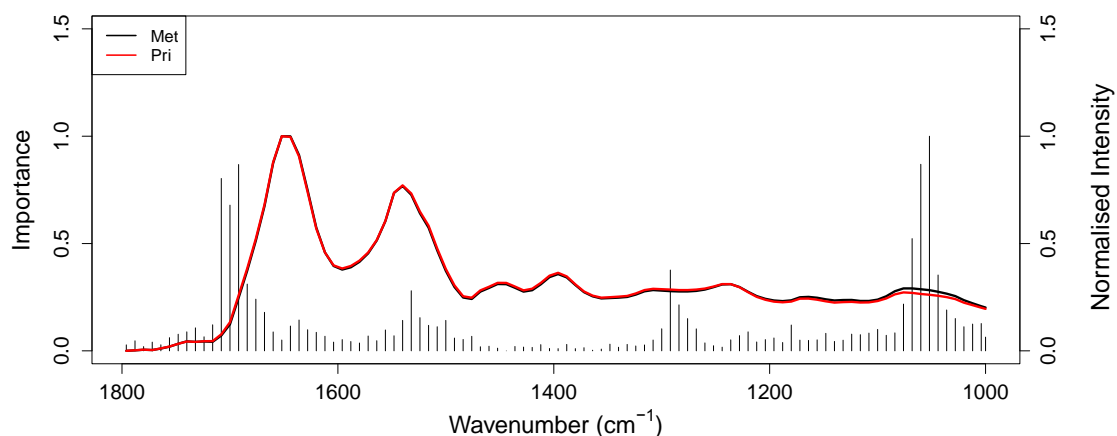

**Figure S4.** - Gini plot outlining the most important features for the Random Forest classification between primary (Pri) and metastasis (Met).

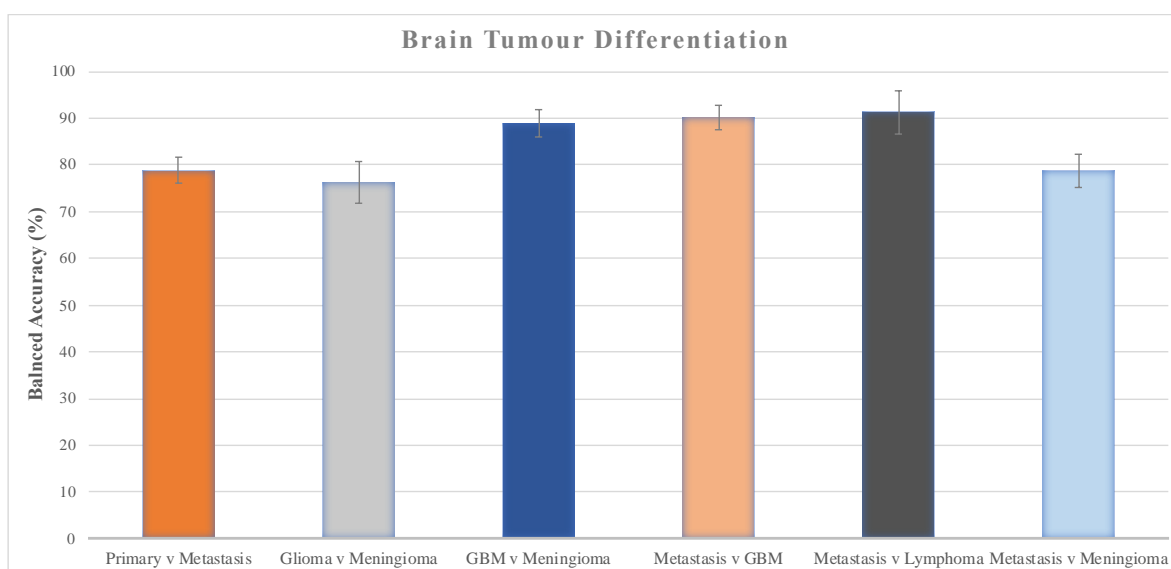

**Figure S5.** - Bar graph of balanced accuracies for the differentiation of brain tumour types with their associated standard deviations.

**Table S1.** – Age and sex information for each of the tested patient groups.

|                    | <i>Control</i> | <i>Primary</i> | <i>Glioma</i> | <i>PCNSL</i> | <i>GBM</i> | <i>Meningioma</i> | <i>Metastasis</i> |
|--------------------|----------------|----------------|---------------|--------------|------------|-------------------|-------------------|
| <b>Total</b>       | 87             | 303            | 192           | 41           | 102        | 111               | 210               |
| <b>Sex (M/F)</b>   | 39/48          | 163/140        | 123/69        | 27/14        | 62/40      | 40/71             | 84/126            |
| <b>Age Range</b>   | 20-64          | 17-85          | 17-85         | 27-86        | 30-85      | 26-81             | 30-86             |
| <b>Average Age</b> | 35             | 54             | 53            | 60           | 61         | 56                | 61                |

**Table S2.** – Additional information on the classification tuning parameters.

| <b>Classification (positive class v negative class)</b> | <b>Tuning Parameters</b> | <b>Model + Sampling</b> |
|---------------------------------------------------------|--------------------------|-------------------------|
| <b>GBM v Control</b>                                    | <i>ncomp 10</i>          | PLS-DA + no             |
| PCNSL v Control                                         | <i>ncomp 14</i>          | PLS-DA + up             |
| Meningioma v Control                                    | <i>ncomp 16</i>          | PLS-DA + up             |

|                         |                                       |                |
|-------------------------|---------------------------------------|----------------|
| Metastasis v Control    | <i>ncomp 13</i>                       | PLS-DA + up    |
| Primary v Metastasis    | <i>ntree 500, nodesize 1, mtry 30</i> | RF + up        |
| Glioma v Meningioma     | <i>cost 0.019</i>                     | SVM + down     |
| GBM v Meningioma        | <i>ntree 500, nodesize 1, mtry 30</i> | RF + no        |
| Metastasis v GBM        | <i>cost 0.019</i>                     | SVM + down     |
| Metastasis v PCNSL      | <i>ncomp 10</i>                       | PLS-DA + smote |
| Metastasis v Meningioma | <i>ncomp 14</i>                       | PLS-DA + up    |

**Table S3.** The top 15 wavenumbers from the Random Forest classification between primary and metastasis with tentative biochemical assignments. The column “ $\Sigma$ Gini” is a summation of the mean decrease in Gini for each wavenumber, over all nodes in all trees in the random forest ensemble, which suggests the regions of highest importance.

| <i>Wavenumbers (cm<sup>-1</sup>)</i> | <i><math>\Sigma</math>Gini</i> | <i>Tentative biological Assignments</i> | <i>Vibrational Modes</i>                        |
|--------------------------------------|--------------------------------|-----------------------------------------|-------------------------------------------------|
| 1052.5                               | 123.47                         | DNA and RNA                             | Symmetric PO <sub>2</sub> <sup>-</sup> stretch  |
| 1060.5                               | 107.86                         | Deoxyribose                             | C-O stretch                                     |
| 1692.5                               | 107.74                         | Amide I of Proteins                     | C=O and C-N stretch, N-H bending                |
| 1708.5                               | 99.96                          | Lipids/Fatty acid esters                | C=O stretch                                     |
| 1700.5                               | 85.15                          | Guanine/Thymine                         | C=O stretch                                     |
| 1068.5                               | 66.56                          | Ribose/Nucleic acids                    | C-O stretch                                     |
| 1292.5                               | 49.11                          | Amide III of Proteins                   | N-H in plane bend, C-N stretch                  |
| 1044.5                               | 46.36                          | Carbohydrate                            | C-O-C stretch and bending                       |
| 1684.5                               | 41.31                          | Amide I of Proteins                     | C=O and C-N stretch, N-H bending                |
| 1532.5                               | 37.61                          | Amide II of Proteins                    | N-H bending, C-N stretching                     |
| 1676.5                               | 32.92                          | Amide I of Proteins                     | C=O and C-N stretch, N-H bending                |
| 1076.5                               | 30.19                          | DNA and RNA                             | Symmetric PO <sub>2</sub> <sup>-</sup> stretch  |
| 1284.5                               | 29.73                          | Phosphodiester                          | Asymmetric PO <sub>2</sub> <sup>-</sup> stretch |
| 1036.5                               | 26.92                          | Carbohydrate/Glycogen                   | C-O and C-C stretch, C-OH deformation           |
| 1668.5                               | 25.63                          | Amide I of Proteins                     | C=O and C-N stretch, N-H bending                |
